# Supplementary material for: Minding the margins: Evaluating the impact of COVID-19 among Latinx and Black communities with optimal qualitative serological assessment tools
Source: PubMed Central journal article supplement (PMC11271856; doi:10.1371/journal.pone.0307568), 2024-07-25
Supplement: pone.0307568.s012.pdf [file pone.0307568.s012.pdf]

# Active Seronet Recruitment

---

Record ID

---

---

Participant ID

---

---

Which language would you prefer to use?

- English  
 Español

¿Qué idioma prefiere usar?

---

Demographic Information

---

Today's date

---

---

First name

---

---

Last name

---

---

Your date of birth

---

((mm/dd/yyyy))

---

Do you consider yourself.....?

- Black  
 African American  
 Chinese American  
 Indian American  
 Filipino American  
 Asian  
 Native Hawaiian or Other Pacific Islander  
 American Indian or Alaska Native  
 White  
 More than one - Mix  
 Other

---

Please explain other

---

---

Do you consider yourself.....?

---

---

What is your gender?

- Male  
 Female  
 Non-binary  
 Other - please specify

---

Other - please specify

---

---

Are you Latino or Hispanic?

- Yes  
 No

---

What is the highest grade or level of school you have completed or the highest degree you have received?

- Primary/elementary school
- High school (or equivalent)
- College
- Advanced degree
- Other - please specify

---

Other - please specify

---

---

Your phone number

---

(Your contact information is collected solely for this research study and will not be shared with anyone outside of our team.)

---

Your email

---

(Your contact information is collected solely for this research study and will not be shared with anyone outside of our team.)

---

Age

---

---

Symptoms and Exposures

---

Have you ever tested positive for the virus that causes COVID-19 (SARS-CoV-2)?

- Yes
- No

---

Other interval of testing

---

---

How often are you tested for the virus that causes COVID-19?

- Never
- Weekly
- Monthly
- When needed
- Other - please specify

---

Other - please specify

---

---

How many positive COVID-19/SARS-CoV-2 tests have you had?

---

---

When was the sample that turned out positive collected? (MM/DD/YYYY)

---

(If you don't know the exact date you tested positive, then please indicate the month and year.)

What symptoms did you experience in association with the positive test?

- Fever
- Fatigue
- Cough
- Loss of appetite
- Body aches
- Shortness of breath
- Mucus or phlegm
- Sore throat
- Headache
- Congestion or runny nose
- Nausea or vomiting
- Diarrhea
- Chills, sometimes with shaking
- Loss of smell or taste
- Purple fingers or toes (Chilblains)
- A rash on skin, or discolouration of fingers or toes
- Loss of speech or movement
- Conjunctivitis
- Unusual weakness
- Unexplained muscle aches
- Other Symptoms
- None

Other Symptoms

\_\_\_\_\_

How many days were you sick for?

\_\_\_\_\_

If you had to rate your overall well-being while sick where would it fall between 1 and 10? (10 being the most sick/worst symptoms)

- 1
- 2
- 3
- 4
- 5
- 6
- 7
- 8
- 9
- 10

Were you hospitalized because of these symptoms?

- Yes
- No

Have you had a positive test for SARS-COV-2 antibodies (serological/blood test for COVID-19)? Not counting the one being done today.

- Yes
- No

Was the antibody test done as part of a scientific study or was it by personal or clinical request?

- Research Study
- Personal (for example clinical reason)
- Other

Other reason

\_\_\_\_\_

Name of research study

\_\_\_\_\_

---

When was the last time you had a positive antibody test? (mm/dd/yyyy)

\_\_\_\_\_  
(If you don't know the exact date then please indicate the month and year.)

---

When was the antibody sample taken that came back positive? (mm/dd/yyyy)

\_\_\_\_\_  
(If you don't know the exact date then please indicate the month and year.)

---

What symptoms did you experience in association with the positive antibody test?

- Fever
- Fatigue
- Cough
- Loss of appetite
- Body aches
- Shortness of breath
- Mucus or phlegm
- Sore throat
- Headache
- Congestion or runny nose
- Nausea or vomiting
- Diarrhea
- Chills, sometimes with shaking
- Loss of smell or taste
- Purple fingers or toes (Chilblains)
- A rash on skin, or discolouration of fingers or toes
- Loss of speech or movement
- Conjunctivitis
- Unusual weakness
- Unexplained muscle aches
- Other Symptoms
- None

---

Other Symptoms

\_\_\_\_\_

---

How many days were you sick for?

\_\_\_\_\_

---

If you had to rate your overall well-being while sick where would it fall between 1 and 10? (10 being the most sick/worst symptoms)

- 1
- 2
- 3
- 4
- 5
- 6
- 7
- 8
- 9
- 10

---

Were you hospitalized because of these symptoms?

- Yes
- No

---

Do you think you may have had COVID-19 even if not confirmed by a test?

- Yes
- No
- I'm not sure

---

How many times do you think you may have COVID-19?

\_\_\_\_\_

---

When do you think you had COVID-19 (MM/DD/YYYY)?

(If you don't know the exact date, then please indicate the month and year.)

---

What symptoms did you experience?

- Fever
- Fatigue
- Cough
- Loss of appetite
- Body aches
- Shortness of breath
- Mucus or phlegm
- Sore throat
- Headache
- Congestion or runny nose
- Nausea or vomiting
- Diarrhea
- Chills, sometimes with shaking
- Loss of smell or taste
- Purple fingers or toes (Chilblains)
- A rash on skin, or discolouration of fingers or toes
- Loss of speech or movement
- Conjunctivitis
- Unusual weakness
- Unexplained muscle aches
- Other Symptoms
- None

---

Other symptoms

\_\_\_\_\_

---

How many days were you sick for?

\_\_\_\_\_

---

If you had to rate your overall well-being while sick where would it fall between 1 and 10? (10 being the most sick/worst symptoms)

- 1
- 2
- 3
- 4
- 5
- 6
- 7
- 8
- 9
- 10

---

Were you hospitalized because of these symptoms?

- Yes
- No

---

If you had COVID-19, are you feeling better or do you have lingering health concerns?

- I am feeling better
- I am not back to 100%
- I believe I have long COVID-19 symptoms (health problems 4 or more weeks after first being infected with the virus that causes COVID-19).
- I never had COVID-19

---

Before the COVID-19 pandemic were you a smoker or a vaper?

- Yes - smoker
- Yes - vaper
- No

Prior to the COVID-19 pandemic, did you have any of the following medical conditions?

- Alcoholism
- Diabetes type I
- Diabetes type II
- Obesity
- Chronic kidney disease
- Dementia
- Alzheimer's disease
- Chronic liver disease
- Other Chronic respiratory disease (e.g., COPD, Emphysema) (specify)
- Asthma
- Chronic oxygen requirement
- Coronary artery disease
- Epilepsy
- Multiple sclerosis
- Other Chronic Neurological condition (specify)
- Hepatitis
- Hypertension
- Congestive heart failure
- Cancer
- Immune deficiency/HIV/AIDS
- Autoimmune/Immunocompromised condition
- Psychological/psychiatric condition
- Substance Use Disorders
- Other chronic diseases (specify)
- None

Other Chronic respiratory disease (e.g., COPD, Emphysema) (specify)

\_\_\_\_\_

Other Chronic Neurological condition (specify)

\_\_\_\_\_

Other chronic diseases (specify)

\_\_\_\_\_

Vaccination

Have you been vaccinated against influenza in the past 5 years?

- Yes
- No

Have you been vaccinated against the virus that causes COVID-19?

- Yes
- No

Have you been confirmed or suspected to have COVID-19 prior to vaccination?

- Yes
- No

When did you get your first vaccine dose? (mm/dd/yy)

\_\_\_\_\_  
(If you don't know the exact date, then please indicate the month and year.)

Which vaccine did you get?

- Moderna
- Pfizer
- Johnson & Johnson
- Other

Other vaccine

\_\_\_\_\_

---

Did you experience vaccine-associated symptoms with your first shot?

- None
- Arm soreness
- Arm swelling
- Fever
- Chills
- Fatigue
- Nausea
- Swollen lymph nodes
- Muscle pain
- Headache
- Other body aches
- Other

---

Other symptoms

\_\_\_\_\_

---

How long did the symptoms persist?

- 24 hrs
- 48 hrs
- Other

---

Other

\_\_\_\_\_

---

If you had to rate your overall well-being while experiencing the vaccine-associated symptoms for the first dose, where would it fall between 1 and 10? (10 being the most sick/worst symptoms)

- 1
- 2
- 3
- 4
- 5
- 6
- 7
- 8
- 9
- 10

---

Were you hospitalized because of these symptoms?

- Yes
- No

---

Did you get your second vaccine dose?

- Yes
- No
- My vaccine only requires 1 shot

---

When did you get your second vaccine dose? (mm/dd/yy)

\_\_\_\_\_

(If you don't know the exact date, then please indicate the month and year.)

---

Would you get an approved COVID-19 vaccine if offered to you?

- Yes
- No
- I would like more information on the vaccine before making that kind of decision

---

Why would you not want to get vaccinated?

\_\_\_\_\_

---

Have you had a booster?

- Yes
- No

---

Which vaccine type were you boosted with?

- Moderna
- Pfizer
- Johnson & Johnson
- Other

---

Other booster type

\_\_\_\_\_

Page 13

---

When did you get the booster? (mm/dd/yy)

\_\_\_\_\_  
(If you don't know the exact date, then please indicate the month and year.)

---

Can someone from this study contact you in the future to ask you other COVID-19-related questions?

- Yes
- No

---

If you do not mind, please indicate why you prefer not to be contacted by a study team member.

\_\_\_\_\_

---

Please feel free to leave any message for the study team.

\_\_\_\_\_

---

Please make sure to submit the survey.  
Thank you very much for your time and help!
